# Supplementary material
Source: HighWire-hosted journal article supplement (http://www.qdcxjkg.com/highwire/filestream/113711/field_highwire_adjunct_files/0/ERJ-00822-2012_Disclosures.pdf)
Supplement: ERJ-00822-2012_Disclosures.pdf [file ERJ-00822-2012_Disclosures.pdf]

**T. Bitter** received travel support grants for symposia from ResMed GmbH & Co. KG and Weinmann Geräte für Medizin GmbH & Co. KG.
